# Supplementary material for: The mitochondrial genome of Phallusia mammillata and Phallusia fumigata (Tunicata, Ascidiacea): high genome plasticity at intra-genus level
Source: BMC Evol Biol. 2007 Aug 31;7:155. doi: 10.1186/1471-2148-7-155 (PMC2220002; doi:10.1186/1471-2148-7-155)

## Ala

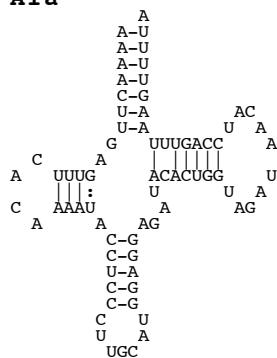

**Arg**

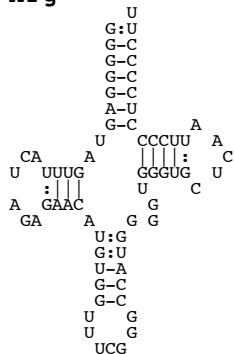

**Asn**

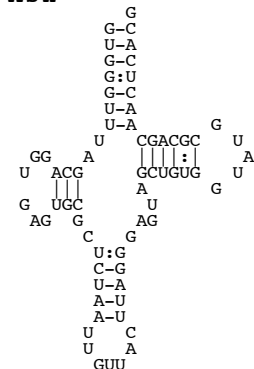

**Cys**

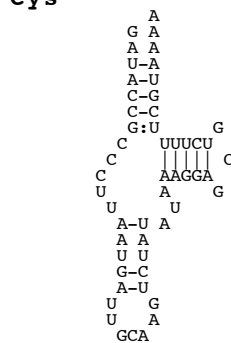

**Gln**

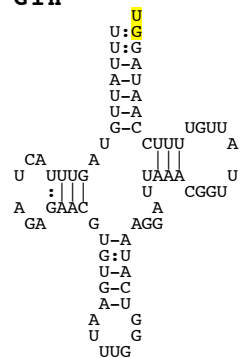

**Glu**

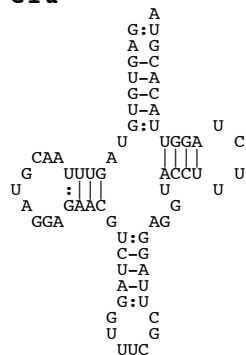

**Gly ( GGN )**

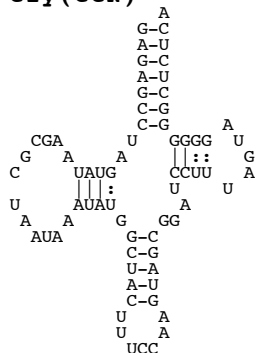

**Gly (AGR)**

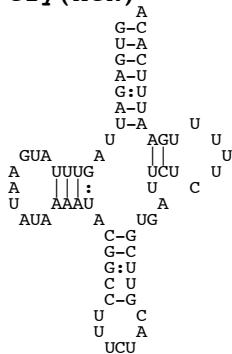

**H i s**

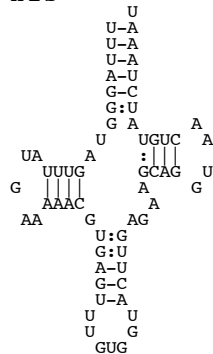

```

Ile1[2]

```

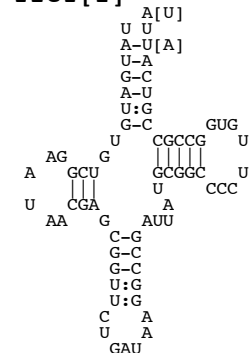

## Leu ( CUN )

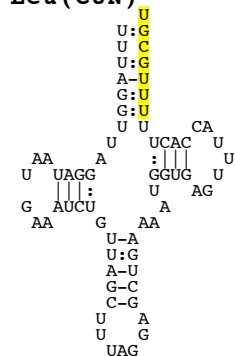

**Leu (UUR)**

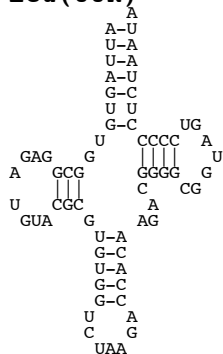

**Lys**

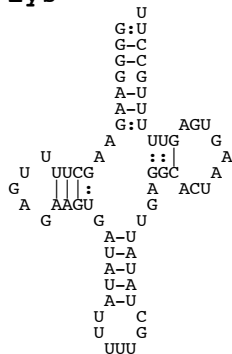

## Met (CAU)

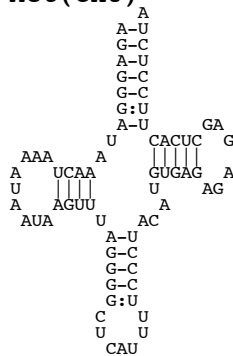

## Met (UAU)

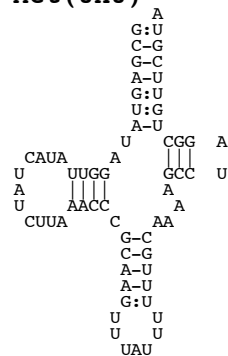

**Phe**

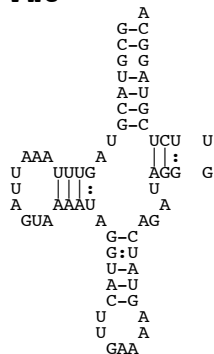

**Pro**

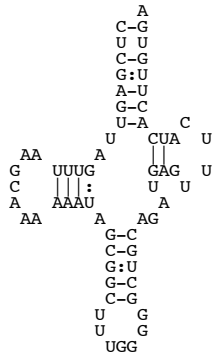

**Ser (AGY)**

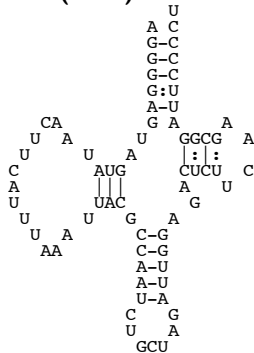

**Ser (UCN)**

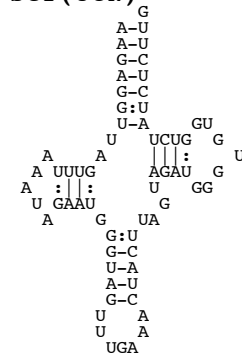

**Thr**

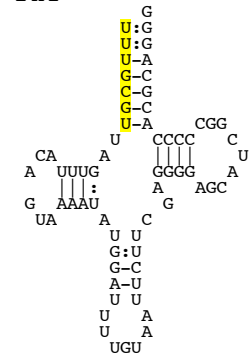

**Trp**

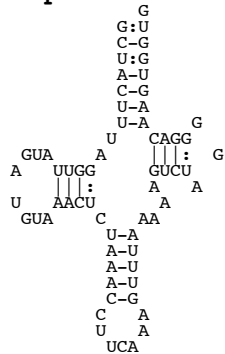

## Tyr

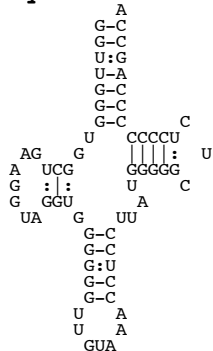**Val**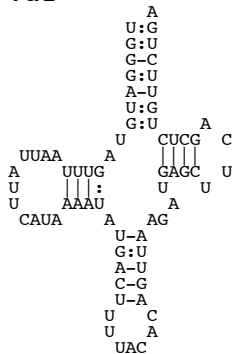

Supplement: Additional file 3 — Putative secondary structures of tRNAs encoded by Phallusia fumigata mtDNA. Putative secondary structures of tRNAs encoded by P. fumigata mtDNA. Canonical and G-U base pairing are differently indicated. Yellow background indicates overlapped sequences belonging to adjacent tRNA genes. Nucleotides in square brackets indicate differences in tRNA-Ile2 compared to the reported tRNA-Ile1 sequence. [file 1471-2148-7-155-S3.pdf]
