# Supplementary material for: The mitochondrial genome of Phallusia mammillata and Phallusia fumigata (Tunicata, Ascidiacea): high genome plasticity at intra-genus level
Source: BMC Evol Biol. 2007 Aug 31;7:155. doi: 10.1186/1471-2148-7-155 (PMC2220002; doi:10.1186/1471-2148-7-155)

Ala

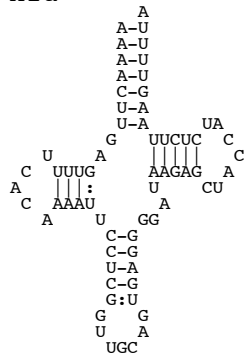

Arg

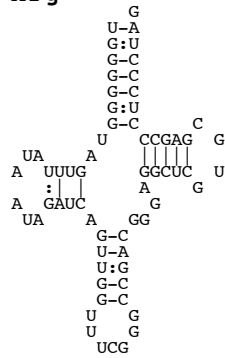

Asn

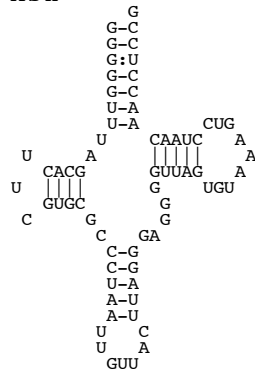

Cys

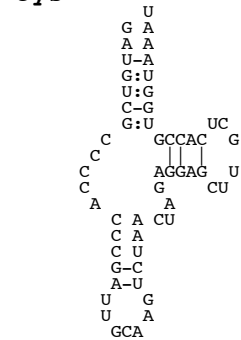

Gln

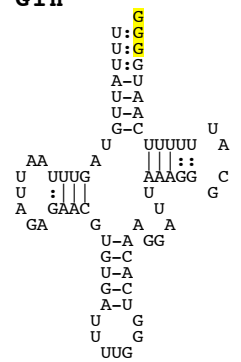

Glu

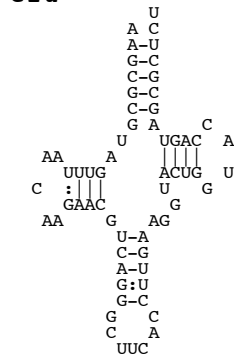

Gly (GGN)

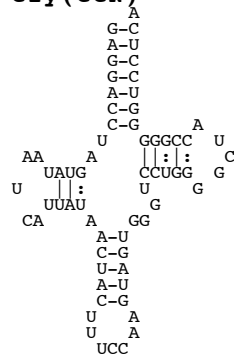

Gly (AGR)

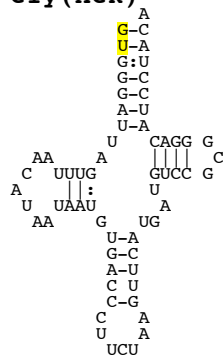

His

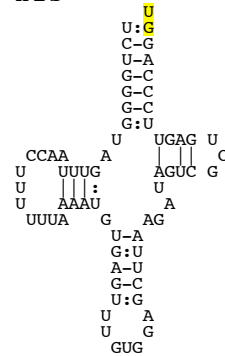

Ile

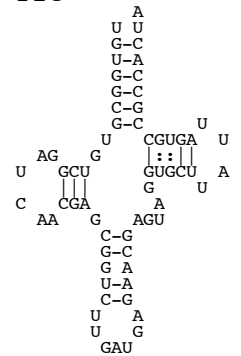

Leu (CUN)

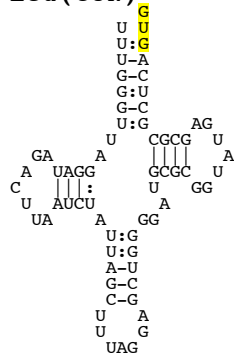

Leu (UUR)

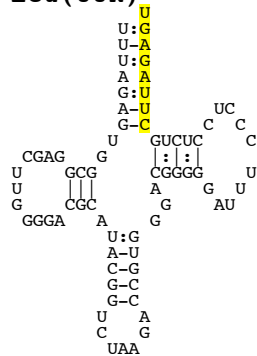

Lys

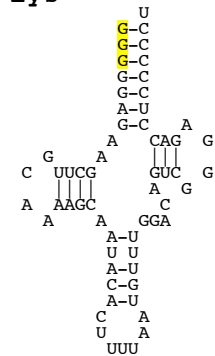

Met (CAU)

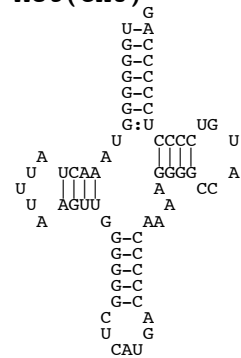

Met (UAU)

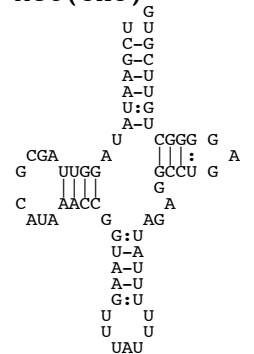

Phe

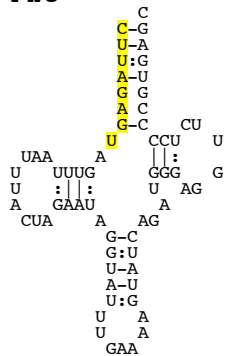

Pro

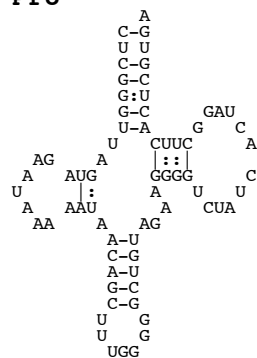

Ser (AGY)

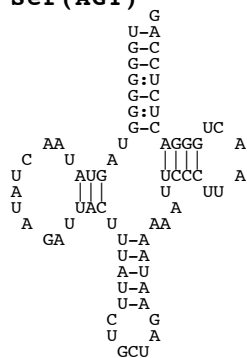

Ser (UCN)

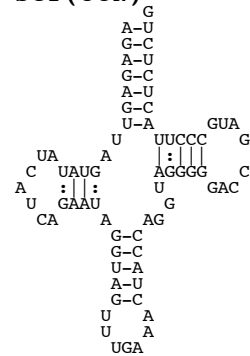

Thr

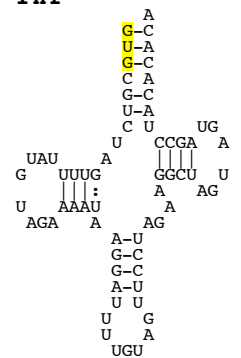

Trp

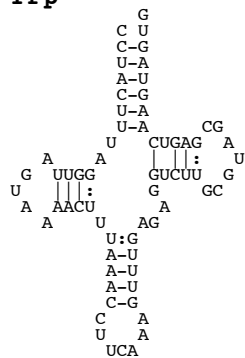

Tyr

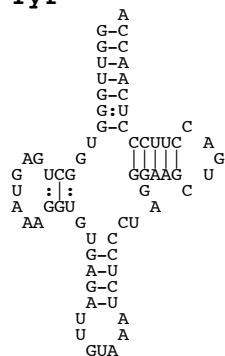

Val

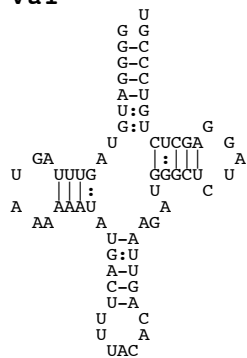

Supplement: Additional file 4 — Putative secondary structures of tRNAs encoded by Phallusia mammillata mtDNA. Putative secondary structures of tRNAs encoded by P. mammillata mtDNA. Canonical and G-U base pairing are differently indicated. Yellow background indicates overlapped sequences belonging to adjacent tRNA genes. [file 1471-2148-7-155-S4.pdf]
